# Supplementary material
Source: PubMed Central journal article supplement (PMC2713993)
Supplement: NIHMS57372-supplement-Arrays.pdf [file NIHMS57372-supplement-Arrays.pdf]

## **Supporting Information:**

# **Copper-Hydroperoxo Mediated N-Debenzylation Chemistry Mimicking Aspects of Copper Monooxygenases**

Debabrata Maiti, Amy A. Narducci Sarjeant and Kenneth D. Karlin \*

*Department of Chemistry, The Johns Hopkins University, Baltimore, MD 21218.*

\*Corresponding Author: [karlin@jhu.edu](mailto:karlin@jhu.edu)

**X-ray Crystal Structure of  $[(L^{NH(CH_2Ph)})Cu^{II}(Cl)]ClO_4$  (10).** The chloride (Cl1), alkylamino nitrogen (N2) and pyridyl groups not substituted in the 6-position (N1 and N3) comprise the basal plane in the five-coordinate complex. Five-coordinated copper(II) ion has a slightly distorted square pyramidal geometry ( $\tau = 0.197$ ), with weak axial  $Cu^{II}$ -Npy' interaction ( $Cu-N4 = 2.412(2)$ ). Selected bond distances and angles are listed in Table S1.

**Table S1.** Selected Distances and Angles for  $[(L^{NH(CH_2Ph)})Cu^{II}(Cl)]^+$  (10).

| <b>Bond Lengths (Å)</b> |            | <b>Bond Angles (deg)</b> |           |
|-------------------------|------------|--------------------------|-----------|
| Cu(1)-N(1)              | 1.9880(18) | N(1)-Cu(1)-N(3)          | 163.34(8) |
| Cu(1)-N(3)              | 1.9993(18) | N(1)-Cu(1)-N(2)          | 82.05(7)  |
| Cu(1)-N(2)              | 2.0503(18) | N(3)-Cu(1)-N(2)          | 83.47(7)  |
| Cu(1)-Cl(1)             | 2.2311(8)  | N(1)-Cu(1)-Cl(1)         | 96.36(6)  |
| Cu(1)-N(4)              | 2.412(2)   | N(3)-Cu(1)-Cl(1)         | 97.40(6)  |
| N(1)-C(5)               | 1.349(3)   | N(2)-Cu(1)-Cl(1)         | 175.17(5) |

**Table S2.** Selected Distances and Angles for  $[(L^{N(CH_2Ph)_2})Cu^{II}(H_2O)(ClO_4)]^+$  (1).

| <b>Bond Lengths (Å)</b> |            | <b>Bond Angles (deg)</b> |           |
|-------------------------|------------|--------------------------|-----------|
| Cu(1)-O(1)              | 1.9723(11) | O(1)-Cu(1)-N(1)          | 94.34(5)  |
| Cu(1)-N(1)              | 1.9885(12) | O(1)-Cu(1)-N(3)          | 99.06(5)  |
| Cu(1)-N(3)              | 1.9965(12) | N(1)-Cu(1)-N(3)          | 166.31(5) |
| Cu(1)-N(2)              | 2.0104(12) | O(1)-Cu(1)-N(2)          | 175.69(5) |
| Cu(1)-O(2)              | 2.3515(11) | N(1)-Cu(1)-N(2)          | 83.57(5)  |
| O(1)-H(1B)              | 0.78(2)    | N(3)-Cu(1)-N(2)          | 83.24(5)  |
| O(1)-H(1O)              | 0.77(3)    | O(1)-Cu(1)-O(2)          | 86.88(5)  |
| N(1)-C(5)               | 1.3429(19) | N(1)-Cu(1)-O(2)          | 94.29(4)  |

|           |            |                  |           |
|-----------|------------|------------------|-----------|
| N(1)-C(1) | 1.3459(19) | N(3)-Cu(1)-O(2)  | 83.72(5)  |
| N(2)-C(7) | 1.4844(18) | N(2)-Cu(1)-O(2)  | 97.03(5)  |
| N(2)-C(6) | 1.4929(18) | Cu(1)-O(1)-H(1B) | 120.4(16) |

**Table S3.** Selected Distances and Angles for  $[(L^{N(CH_3)_2})Cu^{II}(HCOO^-)(ClO_4)Cu^{II}(L^{NH(CH_3)})](ClO_4)_2$ .

| <b>Bond Lengths (Å)</b> |          | <b>Bond Angles (deg)</b> |            |
|-------------------------|----------|--------------------------|------------|
| Cu(1)-O(2)              | 1.942(2) | O(2)-Cu(1)-N(3)          | 96.00(11)  |
| Cu(1)-N(3)              | 2.020(3) | O(2)-Cu(1)-N(2)          | 175.51(13) |
| Cu(1)-N(2)              | 2.022(3) | N(3)-Cu(1)-N(2)          | 82.15(12)  |
| Cu(1)-N(1)              | 2.023(3) | O(2)-Cu(1)-N(1)          | 99.39(11)  |
| Cu(1)-N(4)              | 2.181(3) | N(3)-Cu(1)-N(1)          | 139.38(12) |
| Cu(2)-O(1)              | 1.953(2) | N(2)-Cu(1)-N(1)          | 84.59(13)  |
| Cu(2)-N(8)              | 1.980(4) | O(2)-Cu(1)-N(4)          | 95.93(12)  |
| Cu(2)-N(6)              | 1.981(4) | N(3)-Cu(1)-N(4)          | 116.10(12) |
| Cu(2)-N(7)              | 2.020(3) | N(2)-Cu(1)-N(4)          | 81.29(15)  |
| O(1)-C(40)              | 1.249(5) | N(1)-Cu(1)-N(4)          | 99.44(11)  |
| O(2)-C(40)              | 1.261(4) | O(1)-Cu(2)-N(8)          | 92.25(13)  |
| N(1)-C(1)               | 1.338(5) | O(1)-Cu(2)-N(6)          | 101.17(12) |
| N(1)-C(5)               | 1.344(4) | N(8)-Cu(2)-N(6)          | 165.50(14) |
| N(2)-C(13)              | 1.471(6) | O(1)-Cu(2)-N(7)          | 168.96(12) |
| N(2)-C(7)               | 1.483(6) | N(8)-Cu(2)-N(7)          | 83.25(17)  |
| N(2)-C(6)               | 1.497(5) | N(6)-Cu(2)-N(7)          | 82.57(16)  |
| N(3)-C(8)               | 1.343(5) | C(40)-O(1)-Cu(2)         | 124.3(2)   |
| N(3)-C(12)              | 1.343(4) | C(40)-O(2)-Cu(1)         | 126.3(2)   |

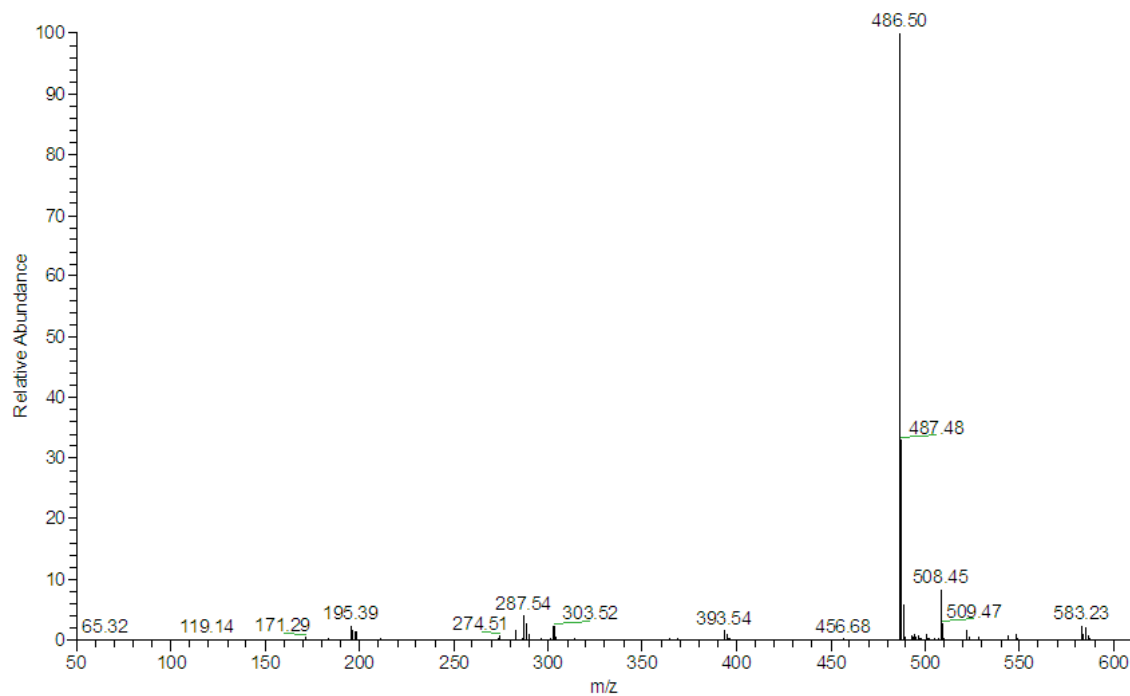

**Figure S1.** ESI-MS spectrum of  $L^{N(CH_2Ph)_2}$ ;  $[L^{N(CH_2Ph)_2} + H]^+$  and  $[L^{N(CH_2Ph)_2} + Na]^+$ .

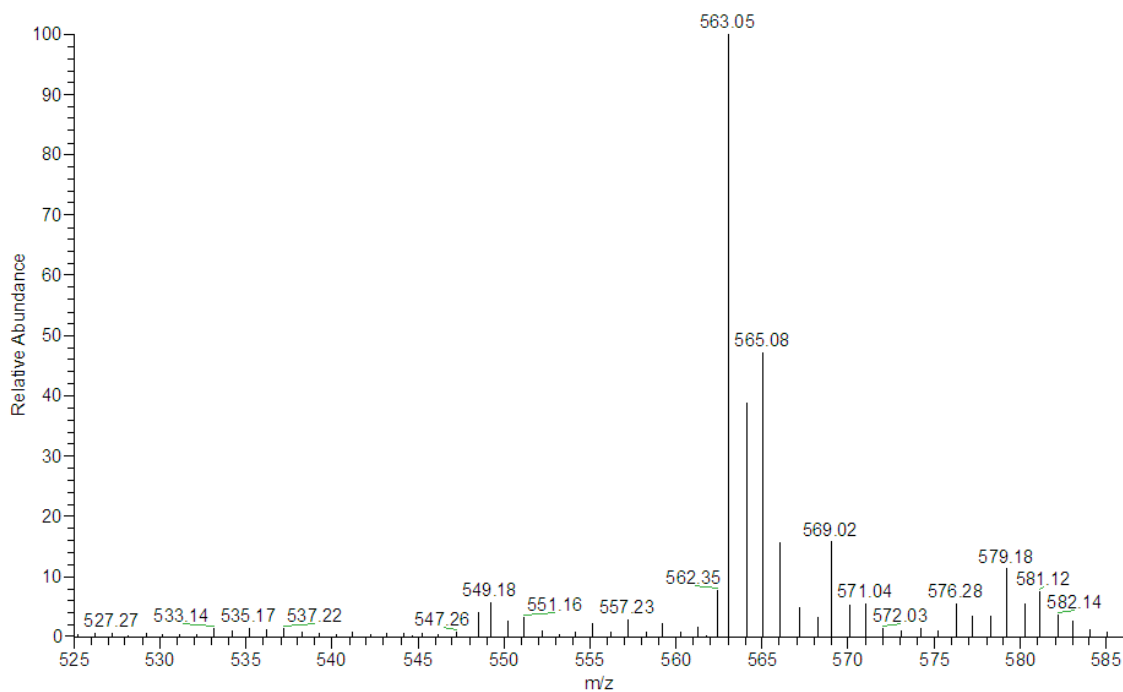

**Figure S2.** ESI-MS spectrum of  $[(L^{N(CH_2Ph)(PhCHO^-)Cu^{II}})^+]$  (4) in acetone obtained from the decomposition of  $[(L^{N(CH_2Ph)_2}Cu^{II}(-OOH))^+]$  (2).

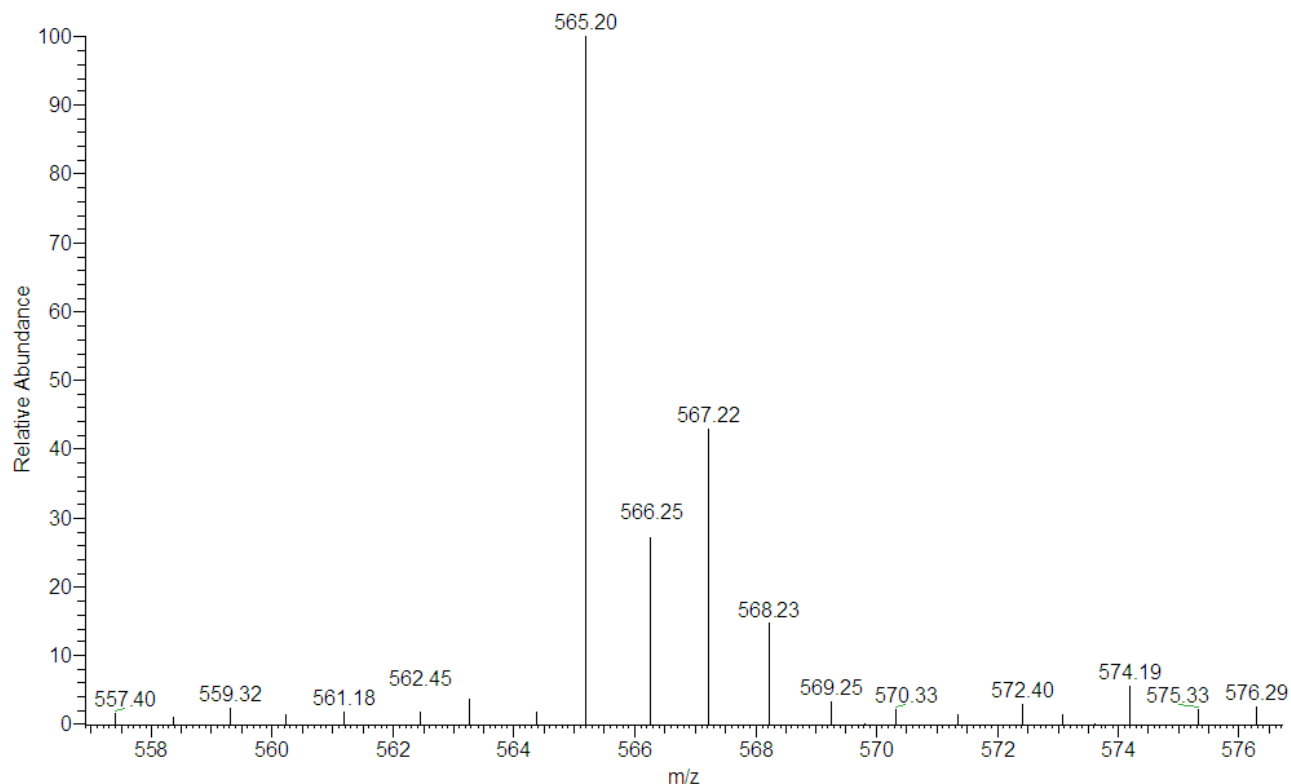

**Figure S3.** ESI-MS spectrum of  $[(\mathbf{L}^{\text{N}(\text{CH}_2\text{Ph})(\text{PhCH}(\text{18})\text{O}^-)}\text{Cu}^{\text{II}})]^+$  in acetone obtained from the decomposition of  $[(\mathbf{L}^{\text{N}(\text{CH}_2\text{Ph})_2}\text{Cu}^{\text{II}}(-^{18}\text{O}^{18}\text{OH}))]^+$ .

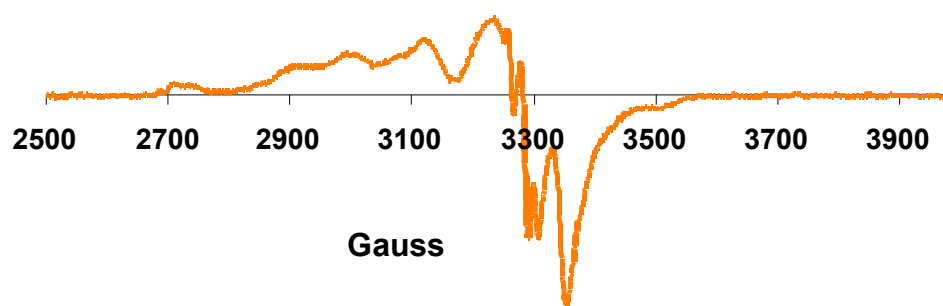

**Figure S4.** EPR spectrum of the decomposition products from  $[(\mathbf{L}^{\text{N}(\text{CH}_2\text{Ph})_2}\text{Cu}^{\text{II}}(-\text{OOH}))]^+$  (**2**) in acetone at 77 K.

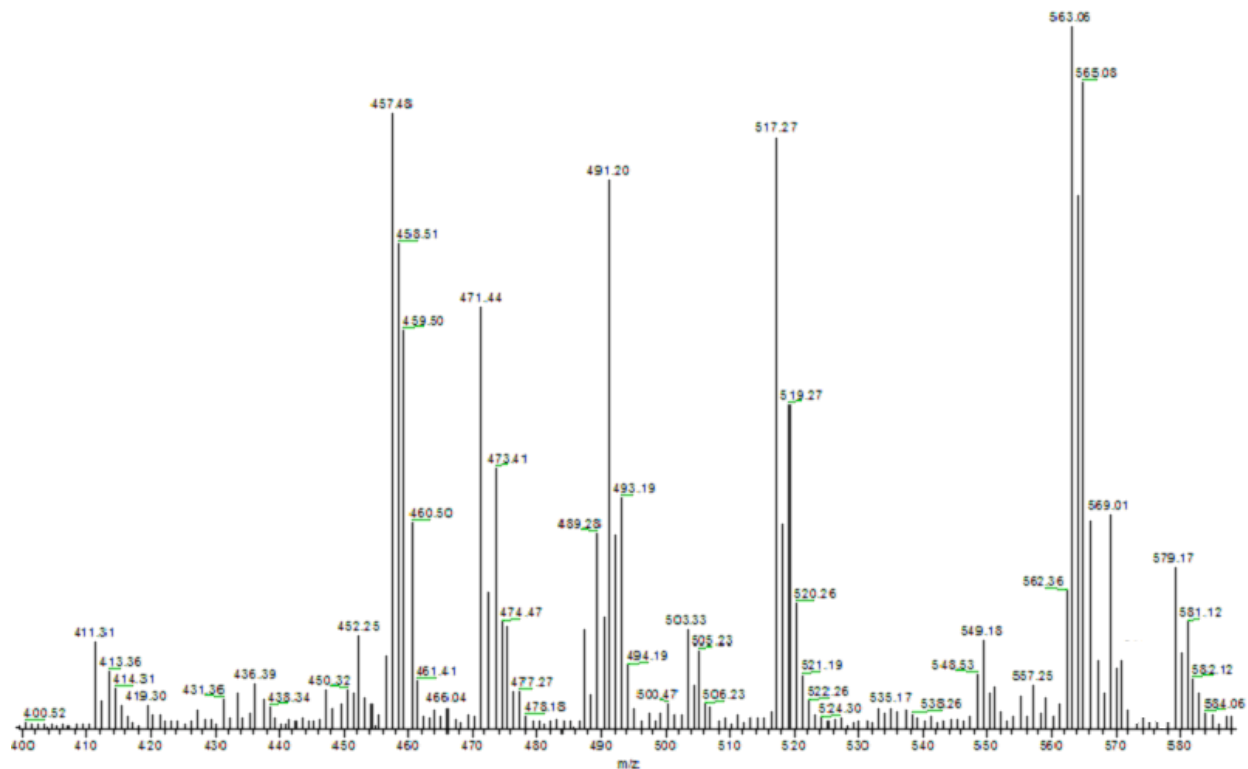

**Figure S5.** ESI-MS spectrum of the decomposition products from  $[(L^{N(CH_2Ph)_2})Cu^{II}(-OOH)]^+$  (**2**) in acetone.

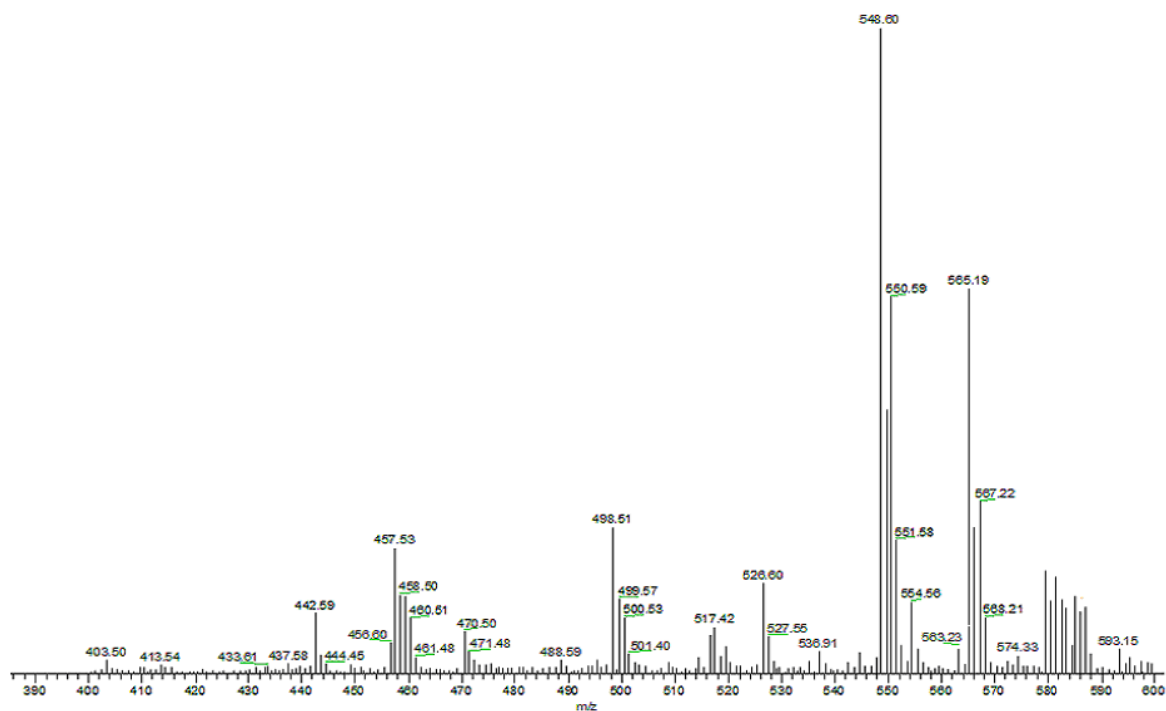

**Figure S6.** ESI-MS spectrum of the decomposition products from  $[(L^{N(CH_2Ph)_2})Cu^{II}(-^{18}O^{18}OH)]^+$  (**2**) in acetone.

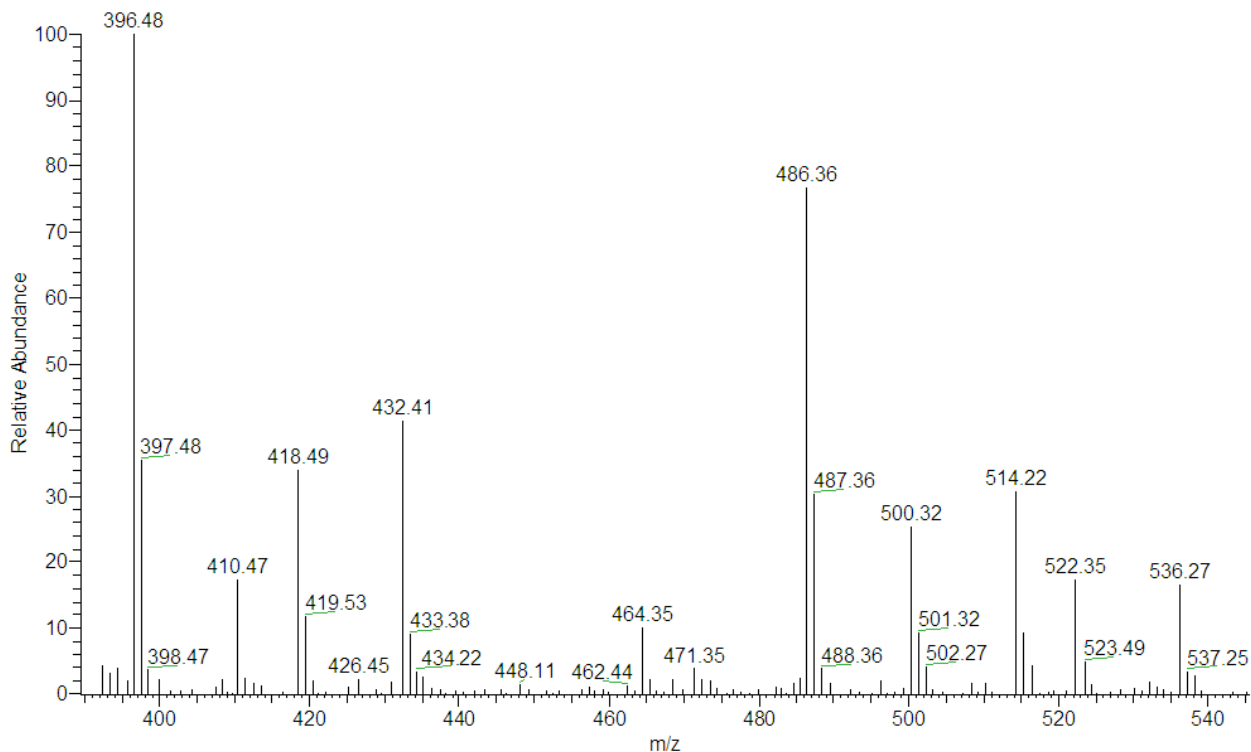

**Figure S7.** ESI-MS spectrum of the extracted organics from the decomposition of  $[(L^{N(CH_2Ph)_2})Cu^{II}(-OOH)]^+$  (**2**) in acetone.

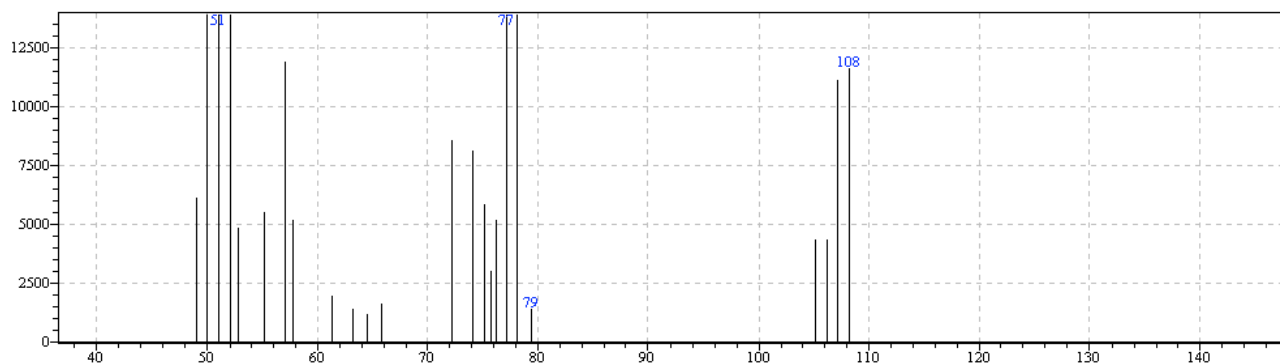

**Figure S8.** GC-MS spectrum of  $PhCH^{18}O$  from the decomposition of  $[(L^{N(CH_2Ph)_2})Cu^{II}(-^{18}O^{18}OH)]^+$ .

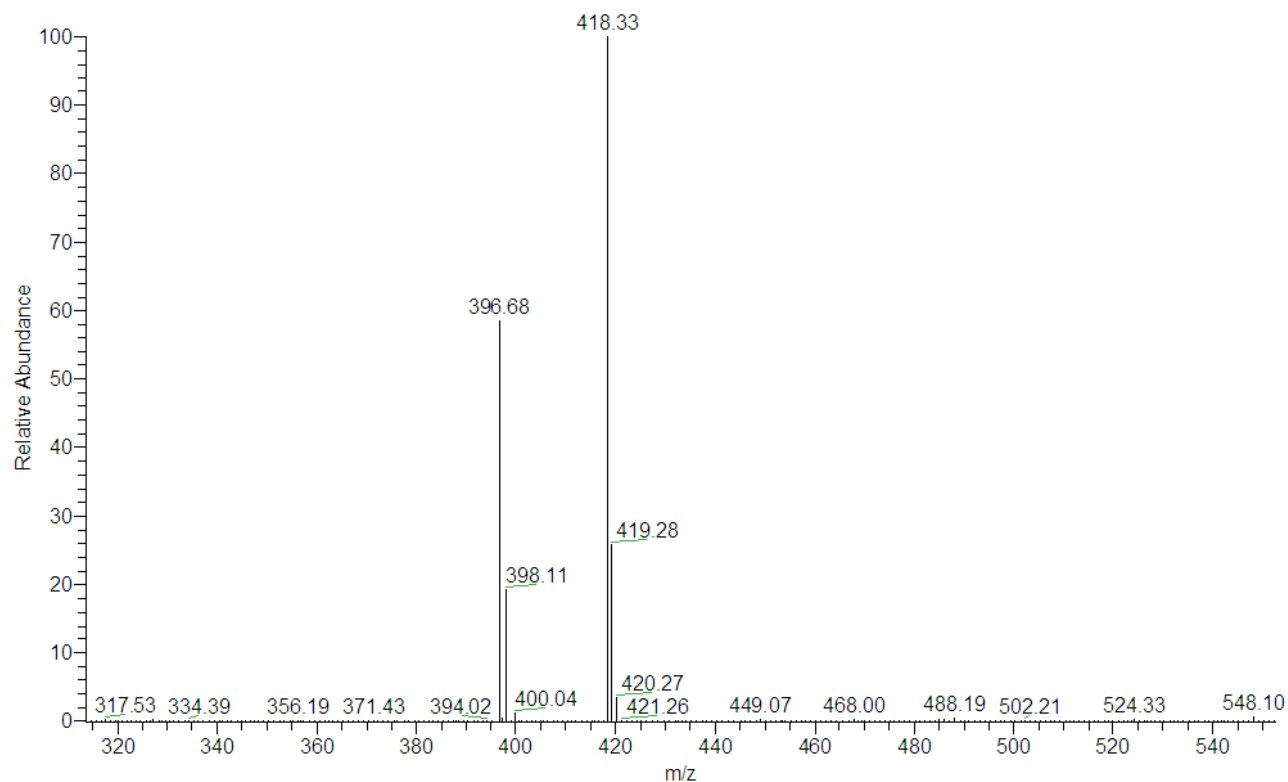

**Figure S9.** ESI-MS spectrum of  $L^{NH(CH_2Ph)}$ ;  $[L^{NH(CH_2Ph)} + H]^+$  and  $[L^{NH(CH_2Ph)} + Na]^+$ .

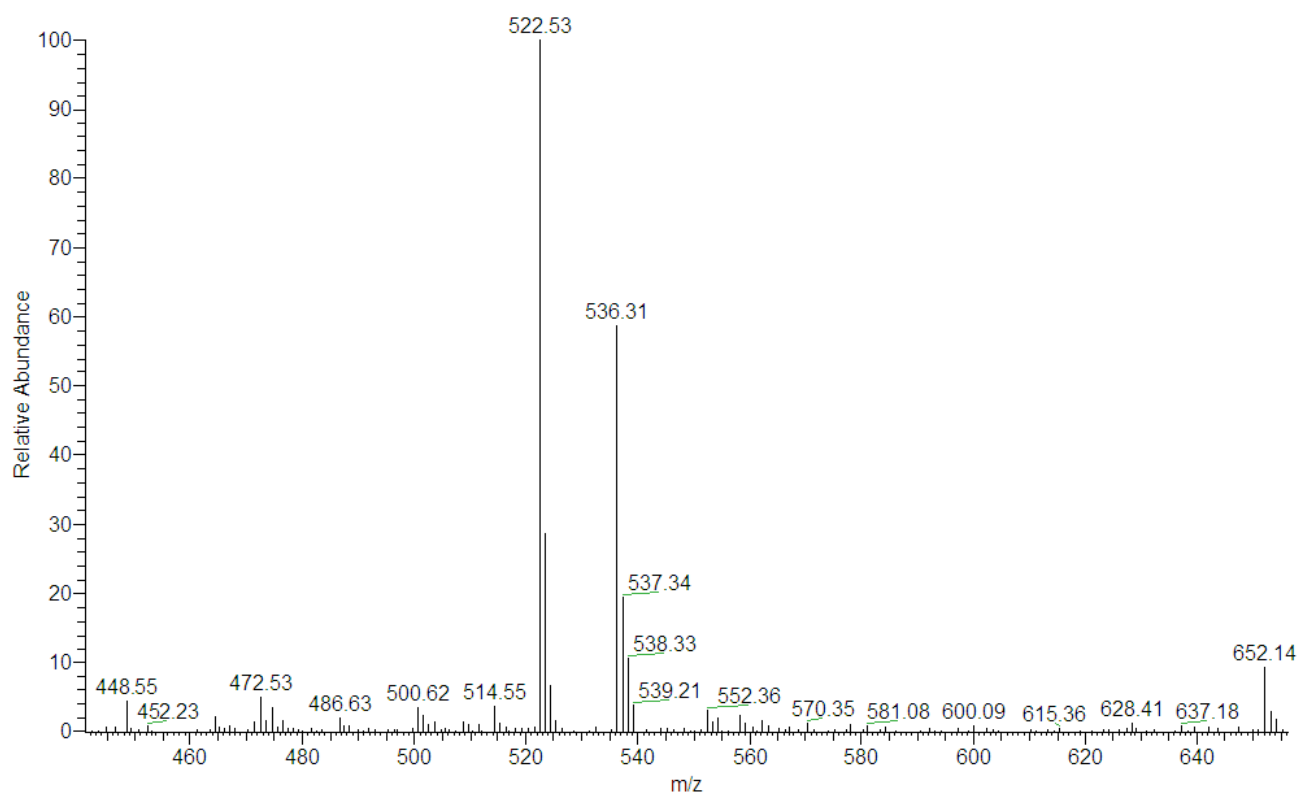

**Figure S10.** ESI-MS spectrum  $L^{N(CH_2Ph)(COPh)}$  and  $L^{N(COPh)_2}$ ;  $[L^{N(CH_2Ph)(COPh)} + Na]^+$  and  $[L^{N(COPh)_2} + Na]^+$ .



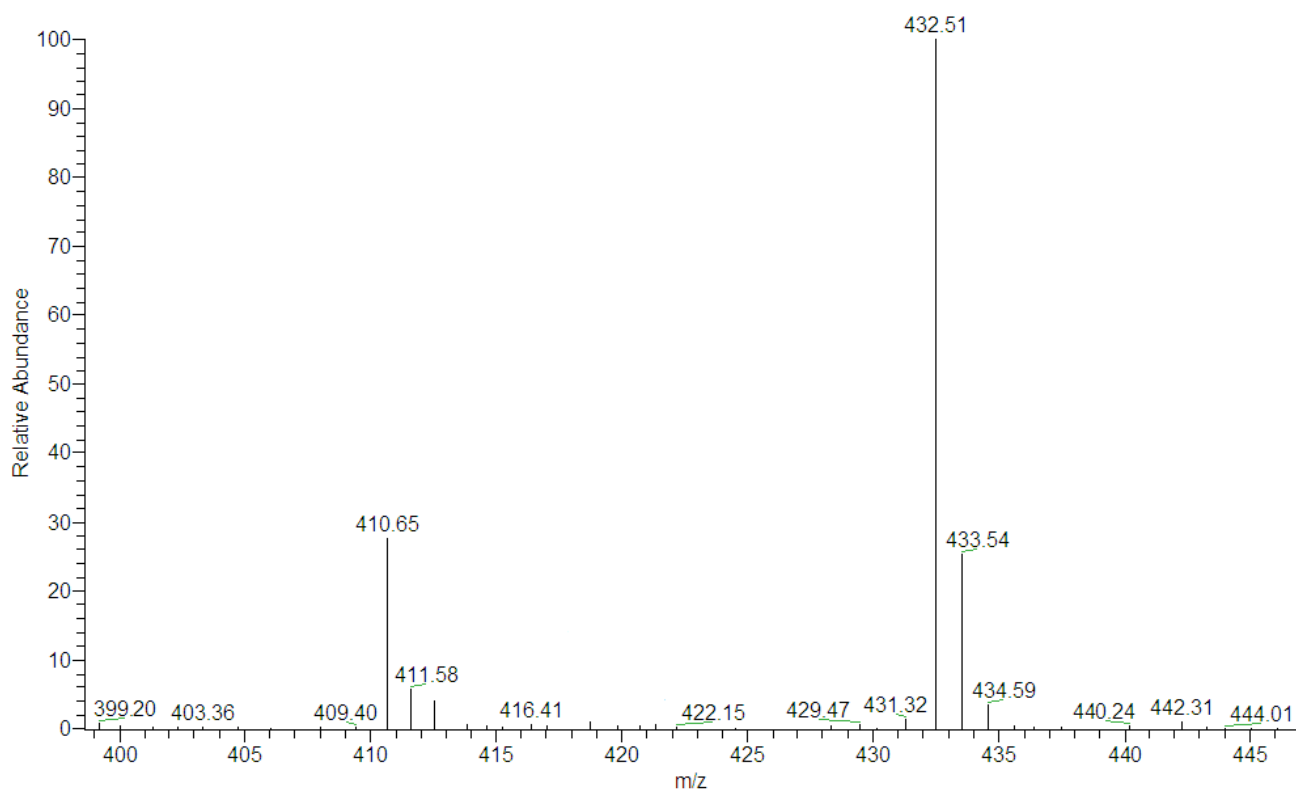

**Figure S11.** ESI-MS spectrum  $L^{NH(COPh)}$ ;  $[L^{NH(COPh)} + H]^+$  and  $[L^{NH(COPh)} + Na]^+$ .

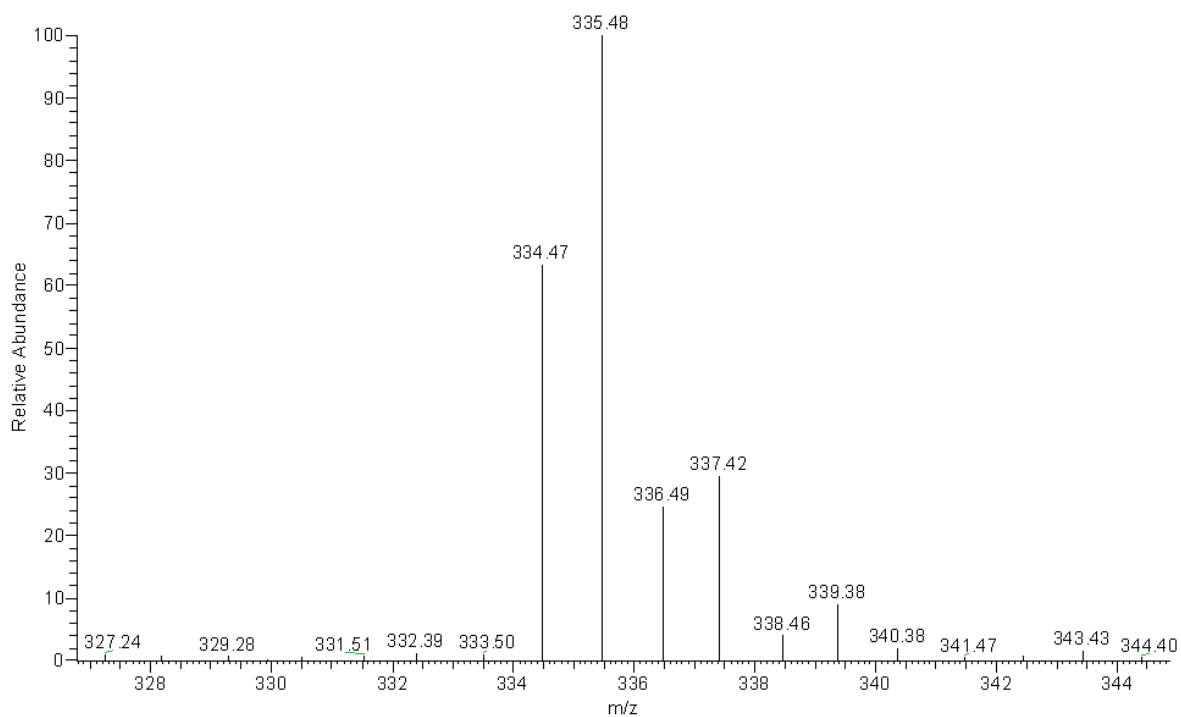

**Figure S12.** ESI-MS spectrum of Unreacted  $L^{N(CH_3)(CD_3)}$  showing scrambling of deuterium labeling in  $L^{N(CH_3)(CD_3)}$  to  $L^{N(CH_3)(CD_2H)}$  ( $m/z = 336$ ,  $M+H$ ),  $L^{N(CH_3)(CDH_2)}$  ( $m/z = 335$ ,  $M+H$ ) and  $L^{N(CH_3)_2}$  ( $m/z = 334$ ,  $M+H$ ).

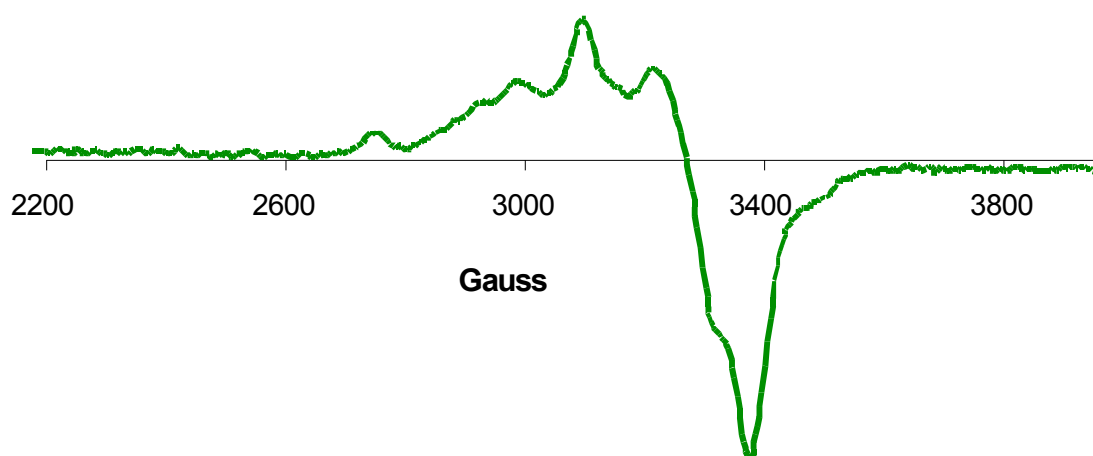

**Figure S13.** EPR spectrum of  $[(\mathbf{L}^{\text{N}(\text{CH}_3)_2})\text{Cu}^{\text{II}}(\text{HCOO}^-)(\text{ClO}_4)\text{Cu}^{\text{II}}(\mathbf{L}^{\text{NH}(\text{CH}_3)})](\text{ClO}_4)_2$  in acetone at 77 K.

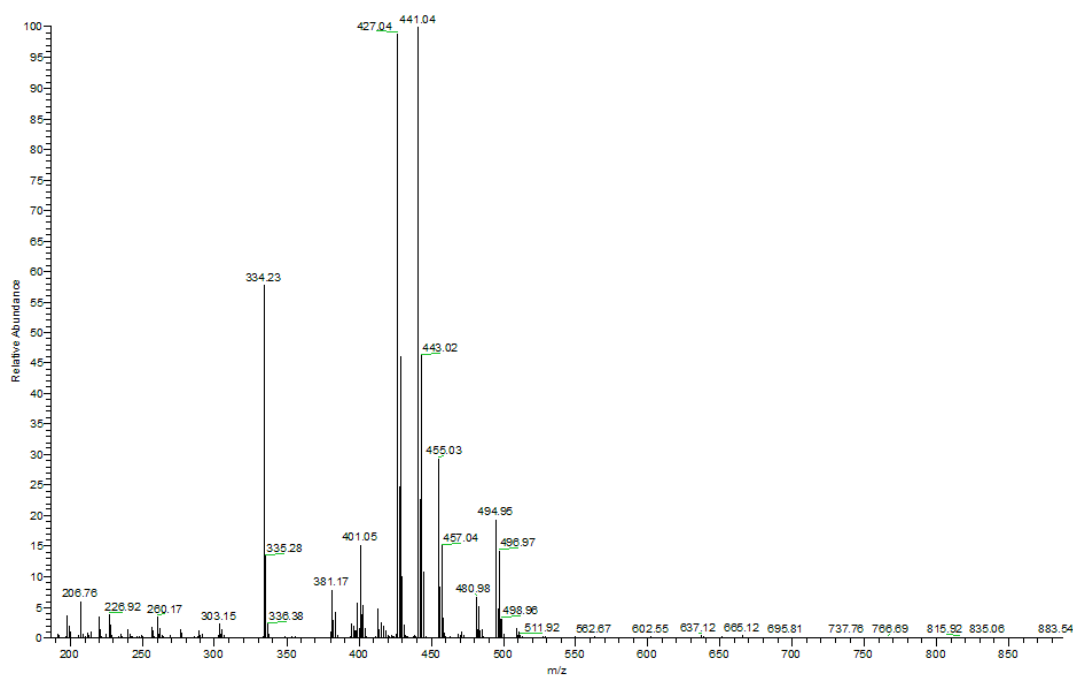

**Figure S14.** ESI-MS spectrum of the crystalline material from the decomposition of  $[(\mathbf{L}^{\text{N}(\text{CH}_3)_2})\text{Cu}^{\text{II}}(-\text{OOH})]^+$  (**3**) in acetone.

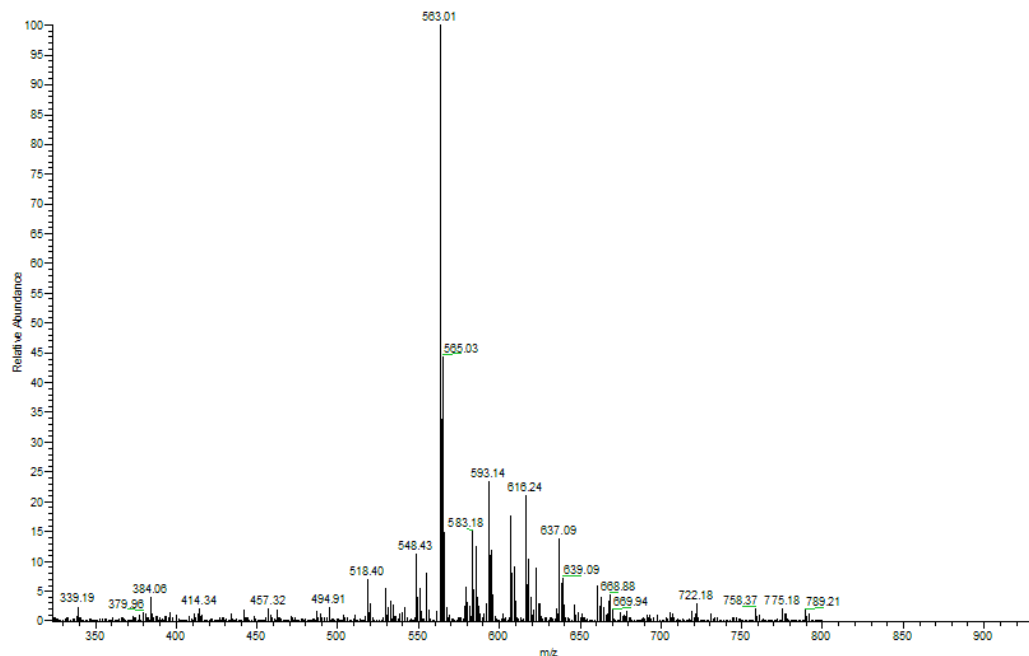

**Figure S15.** ESI-MS spectrum (with dominant peak at  $m/z = 563.01$ ) of  $[(L^{N(CH_2Ph)}(PhCHO^-)Cu^{II})]^+$  (**4**) in acetonitrile obtained from the PhIO reaction with  $[(L^{N(CH_2Ph)_2})Cu^I]^+$  (**6**).

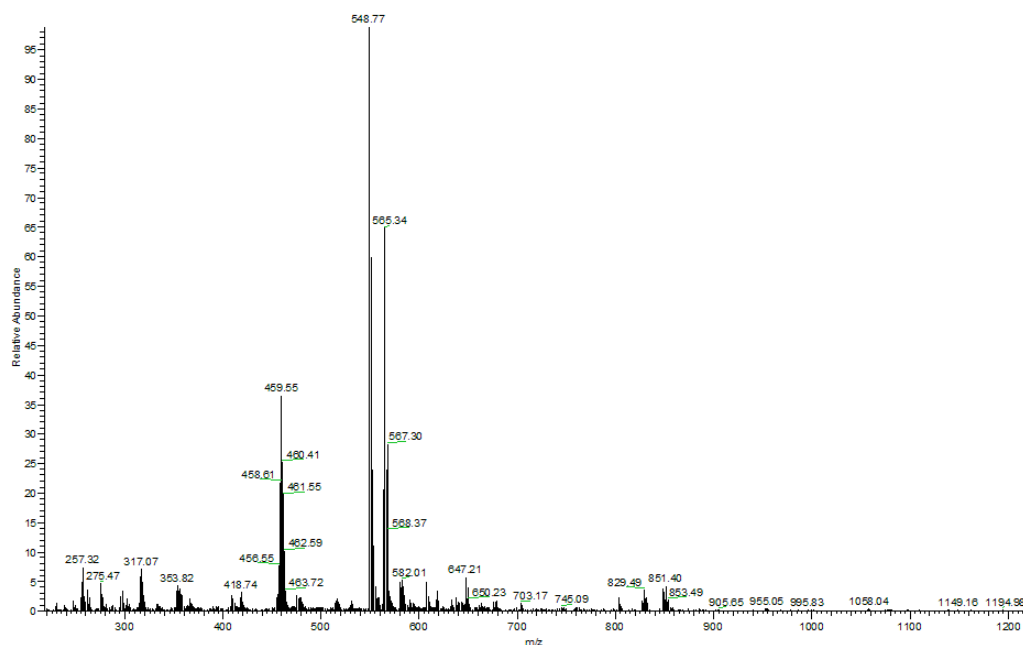

**Figure S16.** ESI-MS spectrum (with strong peak at  $m/z = 565.34$ ) of  $[(L^{N(CH_2Ph)}(PhCH^{18}O^-)Cu^{II})]^+$  (**4**) in acetonitrile obtained from the PhIO plus  $H_2^{18}O$  reaction with  $[(L^{N(CH_2Ph)_2})Cu^I]^+$  (**6**).

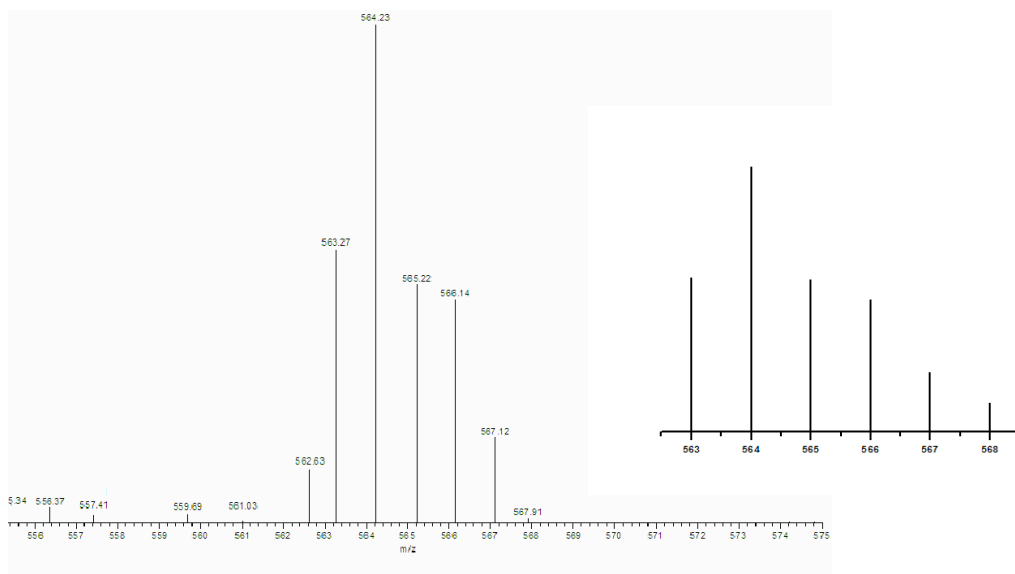

**Figure S17.** ESI-MS spectra from the reaction of  $[(\mathbf{L}^{\text{N}(\text{CH}_2\text{Ph})_2})\text{Cu}^{\text{I}}]^+$  (**6**) with PhIO (after  $\sim 1.6$  min) suggesting the transient formation of the cupryl complex  $[(\mathbf{L}^{\text{N}(\text{CH}_2\text{Ph})_2})\text{Cu}^{\text{II}}\text{-O}\cdot]^+$  (**8**) at  $m/z = 564.23$  ( $\sim 60\%$  formation) and  $[(\mathbf{L}^{\text{N}(\text{CH}_2\text{Ph})(\text{PhCHO})})\text{Cu}^{\text{II}}]^+$  (**4**) at  $m/z = 563.27$  ( $\sim 40\%$  formation). Insets showing the expected pattern for 60% formation of **8** plus 40% formation of **4**. See text for further discussion.

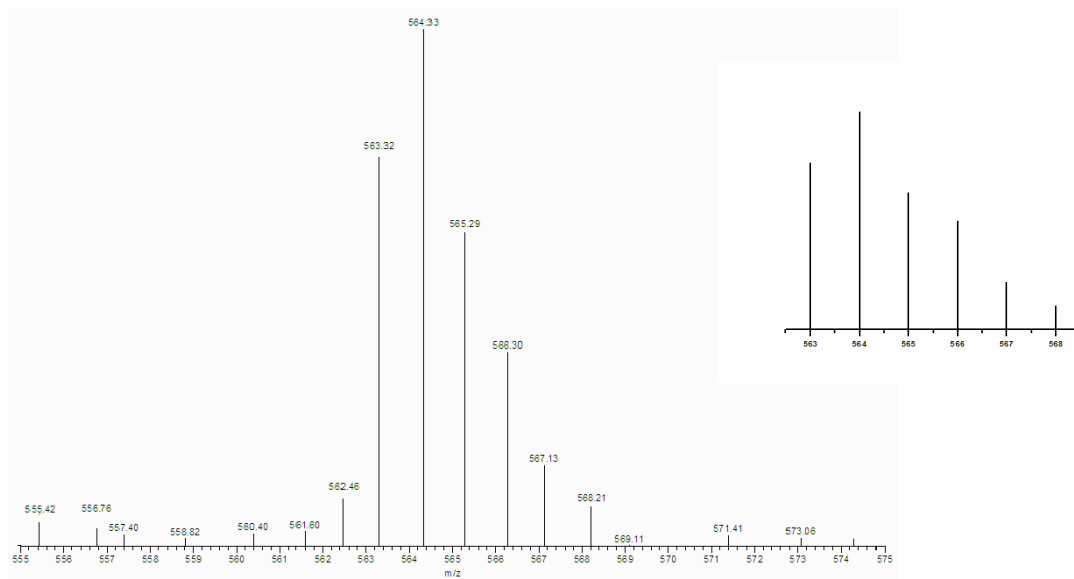

**Figure S18.** ESI-MS spectra from the reaction of  $[(\mathbf{L}^{\text{N}(\text{CH}_2\text{Ph})_2})\text{Cu}^{\text{I}}]^+$  (**6**) with PhIO (after  $\sim 1.8$  min) suggesting the transient formation of the cupryl complex  $[(\mathbf{L}^{\text{N}(\text{CH}_2\text{Ph})_2})\text{Cu}^{\text{II}}\text{-O}\cdot]^+$  (**8**) at  $m/z = 564.33$  ( $\sim 50\%$  formation) and  $[(\mathbf{L}^{\text{N}(\text{CH}_2\text{Ph})(\text{PhCHO})})\text{Cu}^{\text{II}}]^+$  (**4**) at  $m/z = 563.32$  ( $\sim 50\%$  formation). Insets showing the expected pattern for 50% formation of **8** plus 50% formation of **4**. See text for further discussion.

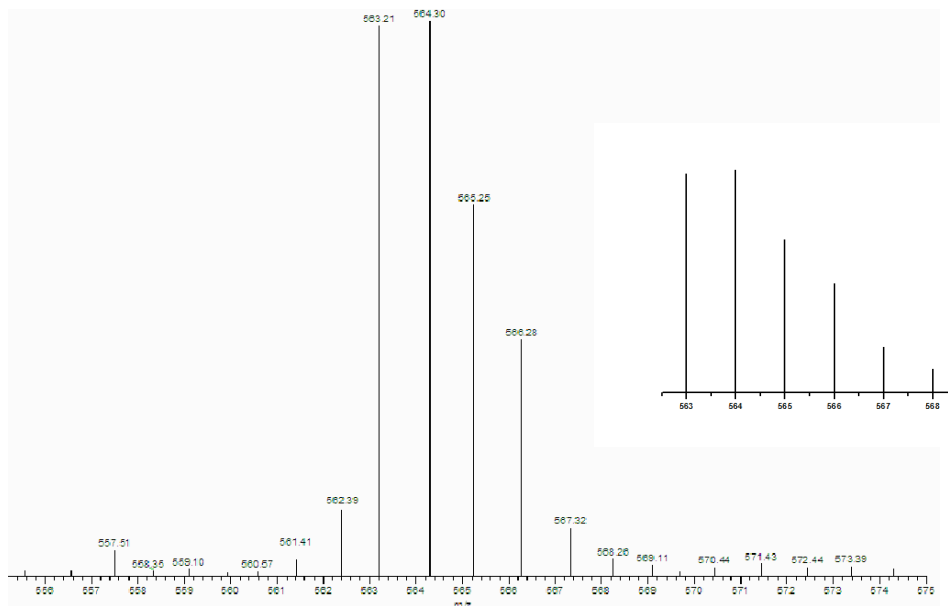

**Figure S19.** ESI-MS spectra from the reaction of  $[(\text{L}^{\text{N}(\text{CH}_2\text{Ph})_2})\text{Cu}^{\text{I}}]^+$  (**6**) with PhIO (after  $\sim 2.1$  min) suggesting the transient formation of the cupryl complex  $[(\text{L}^{\text{N}(\text{CH}_2\text{Ph})_2})\text{Cu}^{\text{II}}\text{-O}\cdot]^+$  (**8**) at  $m/z = 564.30$  ( $\sim 40\%$  formation) and  $[(\text{L}^{\text{N}(\text{CH}_2\text{Ph})(\text{PhCHO-})})\text{Cu}^{\text{II}}]^+$  (**4**) at  $m/z = 563.21$  ( $\sim 60\%$  formation). Insets showing the expected pattern for 40% formation of **8** plus 60% formation of **4**. See text for further discussion.

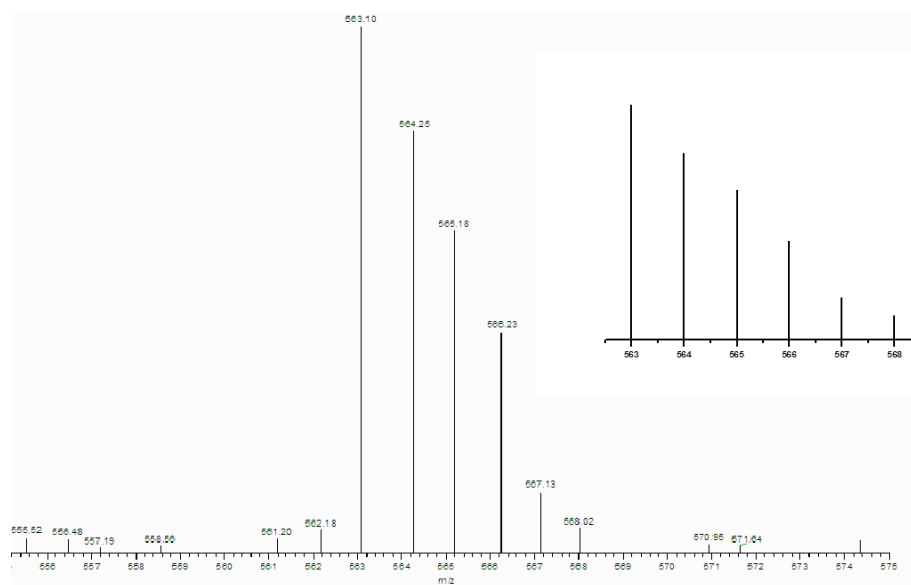

**Figure S20.** ESI-MS spectra from the reaction of  $[(\text{L}^{\text{N}(\text{CH}_2\text{Ph})_2})\text{Cu}^{\text{I}}]^+$  (**6**) with PhIO (after  $\sim 2.4$  min) suggesting the transient formation of the cupryl complex  $[(\text{L}^{\text{N}(\text{CH}_2\text{Ph})_2})\text{Cu}^{\text{II}}\text{-O}\cdot]^+$  (**8**) at  $m/z = 564.25$  ( $\sim 30\%$  formation) and  $[(\text{L}^{\text{N}(\text{CH}_2\text{Ph})(\text{PhCHO-})})\text{Cu}^{\text{II}}]^+$  (**4**) at  $m/z = 563.10$  ( $\sim 70\%$  formation). Insets showing the expected pattern for 30% formation of **8** plus 70% formation of **4**. See text for further discussion.

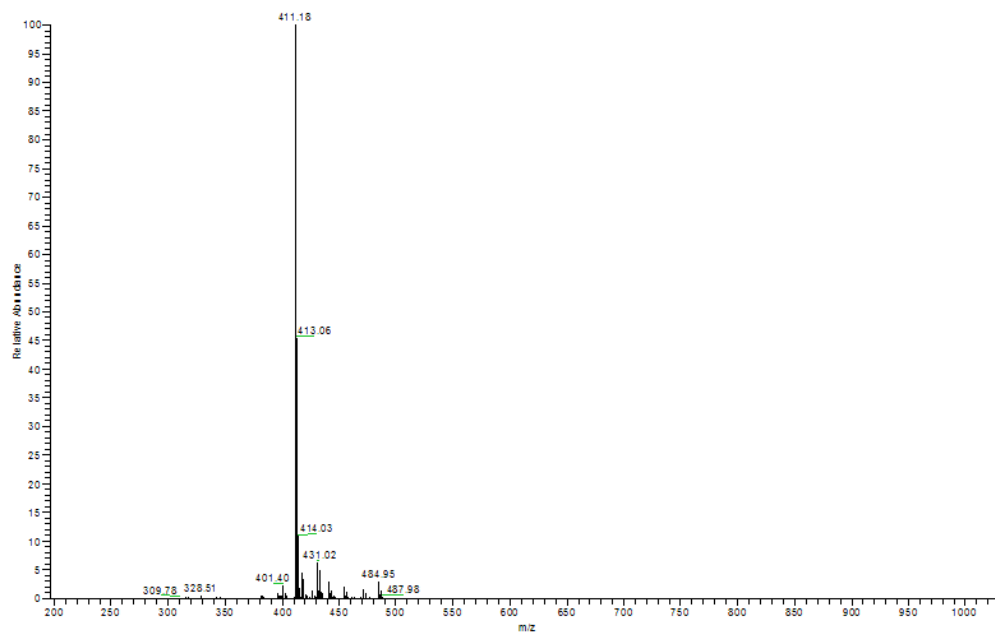

**Figure S21.** ESI-MS spectrum (with dominant peak at  $m/z = 411.18$ ) of  $[(L^{N(CH_3)(CH_2O-)}Cu^{II})^+]$  (**5**) in acetonitrile obtained from the PhIO reaction with  $[(L^{N(CH_3)_2}Cu^I)^+]$  (**7**).
